# Supplementary material
Source: Research Square preprint supplement (doi:10.21203/rs.3.rs-8753515/v1)
Supplement: Supplementary file 1 [file 184d0bdd49c44ae45f2649e1.docx]

**Supplementary C2. Quantitative Codebook (De-identified dataset)**

**Purpose.** This codebook describes the variables, coding schemes, and derived measures included in *Supplementary C1 (Quantitative_dataset_deidentified.xlsx)*. The dataset is provided in de-identified form for editorial and peer-review evaluation.

**Unit of analysis.** Individual external auditors (N = 100).

**Scale format.** All psychometric items are measured on a 5-point Likert-type scale (1 = Strongly disagree; 5 = Strongly agree).

**Constructs.** Professional scepticism (PS); Client pressure (CP); Reliance on management representations (RMR); Perceived detection efficacy (PDE).

**Controls.** BIG4; LEVEL; EXP_years.

**Confidentiality and de-identification.** No direct identifiers (e.g., names, emails, employer names, client names) are included. Respondents are labelled with a non-identifying ID (R001–R100).

**Table C2-1. Variable definitions and coding**

| **Variable** | **Type** | **Values / Coding** | **Description** | **Source / Notes** | **Derived?** |
| --- | --- | --- | --- | --- | --- |
| Respondent_ID | String | R001–R100 | De-identified respondent identifier. | No personal identifiers included. | No |
| BIG4 | Binary | 1 = Big Four; 0 = Non-Big Four | Employer type of respondent. | Used as control variable. | No |
| LEVEL | Binary | 1 = Manager/Partner; 0 = Staff/Senior | Seniority level of respondent. | Used as control variable. | No |
| EXP_years | Numeric | Years (continuous; ≥0.5) | Total years of audit experience. | Used as control variable. | No |
| PS1 | Integer | 1–5 Likert | Professional scepticism item PS1. | Adapted from Hurtt (2010) professional scepticism scale. | No |
| PS2 | Integer | 1–5 Likert | Professional scepticism item PS2. |  | No |
| PS3 | Integer | 1–5 Likert | Professional scepticism item PS3. |  | No |
| PS4 | Integer | 1–5 Likert | Professional scepticism item PS4. |  | No |
| PS5 | Integer | 1–5 Likert | Professional scepticism item PS5. |  | No |
| PS6 | Integer | 1–5 Likert | Professional scepticism item PS6. |  | No |
| PS7 | Integer | 1–5 Likert | Professional scepticism item PS7. |  | No |
| PS8 | Integer | 1–5 Likert (reverse-coded) | Professional scepticism item PS8. Reverse-coded item (higher value indicates higher scepticism after recoding). | Reverse coding applied: recoded value = 6 − original response. | No |
| CP1 | Integer | 1–5 Likert | Client pressure item CP1. | Adapted from Pierce & Sweeney (2004) time/budget/commercial pressure measures. | No |
| CP2 | Integer | 1–5 Likert | Client pressure item CP2. |  | No |
| CP3 | Integer | 1–5 Likert | Client pressure item CP3. |  | No |
| CP4 | Integer | 1–5 Likert | Client pressure item CP4. |  | No |
| CP5 | Integer | 1–5 Likert | Client pressure item CP5. |  | No |
| RMR1 | Integer | 1–5 Likert | Reliance on management representations item RMR1. | Developed from ISA 240 and ISA 580 concepts on management representations. | No |
| RMR2 | Integer | 1–5 Likert | Reliance on management representations item RMR2. |  | No |
| RMR3 | Integer | 1–5 Likert | Reliance on management representations item RMR3. |  | No |
| RMR4 | Integer | 1–5 Likert | Reliance on management representations item RMR4. |  | No |
| PDE1 | Integer | 1–5 Likert | Perceived detection efficacy item PDE1. | Constructed from ISA 240 and revenue/receivables fraud detection literature. | No |
| PDE2 | Integer | 1–5 Likert | Perceived detection efficacy item PDE2. |  | No |
| PDE3 | Integer | 1–5 Likert | Perceived detection efficacy item PDE3. |  | No |
| PDE4 | Integer | 1–5 Likert | Perceived detection efficacy item PDE4. |  | No |
| PDE5 | Integer | 1–5 Likert | Perceived detection efficacy item PDE5. |  | No |
| PS_mean | Numeric | Mean of PS1–PS8 | Composite score for Professional scepticism. | PS8 is reverse-coded prior to averaging. | Yes |
| CP_mean | Numeric | Mean of CP1–CP5 | Composite score for Client pressure. | Averaged across items. | Yes |
| RMR_mean | Numeric | Mean of RMR1–RMR4 | Composite score for Reliance on management representations. | Averaged across items. | Yes |
| PDE_mean | Numeric | Mean of PDE1–PDE5 | Composite score for Perceived detection efficacy (dependent variable). | Averaged across items. | Yes |

**Construct-to-item mapping (for replication)**

**Professional scepticism (PS):** PS1–PS8 (PS8 reverse-coded).

**Client pressure (CP):** CP1–CP5.

**Reliance on management representations (RMR):** RMR1–RMR4.

**Perceived detection efficacy (PDE):** PDE1–PDE5.

**Data processing and transformations**

1) Reverse coding: PS8 is reverse-coded using the transformation (6 − response). 2) Composite scores: PS_mean, CP_mean, RMR_mean, and PDE_mean are computed as the arithmetic mean of their respective items. 3) Missing data: In the final analysis dataset, missing values should be handled consistently with the analysis plan (e.g., listwise deletion for regression). In the dummy dataset provided for review, no missing values are included.
