# Supplementary material
Source: Research Square preprint supplement (doi:10.21203/rs.3.rs-8753515/v1)
Supplement: Supplementary file 2 [file 50d3a3c93b72e81c3a1b995a.docx]

**Supplementary D. De-identified qualitative extracts supporting the findings (review-only)**

**Purpose.** This file provides de-identified interview extracts that illustrate and support the qualitative themes reported in the manuscript. The extracts are supplied for editorial and peer-review evaluation only and are not intended for public release.

**De-identification and confidentiality.** All direct identifiers and potentially identifying details (e.g., names of audit firms, clients, locations, engagement particulars, or distinctive events) have been removed or generalised. Participants are labelled with non-identifying codes (P01–P08).

**Interview period and mode.** Interviews were conducted during the qualitative phase of an explanatory sequential mixed-methods design. Interviews lasted approximately 45–60 minutes and were conducted via secure online calls or face-to-face, depending on participant availability.

**Table D1. Interview participant profile (de-identified)**

| **Participant code** | **Role level** | **Firm type** | **Audit experience (years)** | **Broad client exposure (examples)** |
| --- | --- | --- | --- | --- |
| P01 | Junior | Non-Big Four | 1–3 | E-commerce; multi-outlet retail |
| P02 | Senior | Big Four | 3–5 | Fintech; platform services |
| P03 | Senior | Non-Big Four | 5–7 | Logistics; marketplace sellers |
| P04 | Manager | Big Four | 7–10 | SaaS; subscription-based services |
| P05 | Manager | Non-Big Four | 8–12 | Digital payments; consumer apps |
| P06 | Partner/Engagement Partner | Big Four | 12–16 | High-growth groups; cross-entity revenue flows |
| P07 | Senior | Big Four | 4–6 | On-demand services; payment gateways |
| P08 | Partner/Engagement Partner | Non-Big Four | 10–15 | SME-to-scale-up transitions; platform intermediaries |

**Coding note (brief).**

Extracts were selected to represent maximum variation across firm types and seniority and to illustrate mechanisms that explain the quantitative relationships. Selection prioritised clarity, thematic representativeness, and low re-identification risk. Quotations are reported verbatim with light edits for readability (e.g., removal of filler words) without altering meaning.

**De-identified extracts by theme**

The extracts below are grouped by theme. Each theme corresponds to mechanisms discussed in the qualitative results and used to explain the quantitative associations.

**Theme 1. Sceptical triangulation strengthens detection efficacy (PS → higher PDE)**

**P02 (Senior, Big Four):** “When the revenue story sounds too smooth, we try to triangulate it. We compare the ledger totals with independent traces—payment gateway summaries, app event logs, and operational metrics—before we feel comfortable signing off.”

**P04 (Manager, Big Four):** “Professional scepticism is not just ‘being careful’. It is actively looking for contradictions—where financial numbers do not align with non-financial signals like active users, transaction counts, or fulfilment data.”

**P06 (Partner, Big Four):** “In high-growth clients, management can explain everything. The only way to test that is to insist on evidence that does not originate from the same narrative—third-party data, system logs, or reconciliations that you can reproduce.”

**Theme 2. Client pressure encourages scope trimming and ‘compliance-first’ audits (CP → lower PDE)**

**P01 (Junior, Non-Big Four):** “Under tight deadlines, we prioritise procedures that are easier to document. The deeper checks—like chasing external confirmations or testing digital traces—are the first things that get pushed to ‘if time allows’.”

**P05 (Manager, Non-Big Four):** “Fee constraints and client sensitivity shape how far we can go. You can feel the pressure to keep the relationship smooth, and that can limit how aggressively you challenge revenue recognition assumptions.”

**P07 (Senior, Big Four):** “There is a difference between finishing an audit and finishing a detection-oriented audit. When time is compressed, the team tends to focus on what meets the minimum standard rather than what uncovers hidden manipulation.”

**Theme 3. Reliance on management representations can ‘close’ issues but weaken confidence (RMR → lower PDE)**

**P03 (Senior, Non-Big Four):** “Sometimes confirmations are delayed or not returned. At the end, management representation becomes the ‘last piece’ to close the file, but it does not make you feel more certain that fraud is absent.”

**P04 (Manager, Big Four):** “Representations are required, but they are not the strongest evidence. If we end up relying on them because external data access is limited, the comfort level drops—even if the documentation looks complete.”

**P08 (Partner, Non-Big Four):** “When we cannot access customer-level records or system logs, we may accept internal summaries with representation letters. It is a practical solution, but it narrows the detection net.”

**Theme 4. Digital evidence is valuable but often difficult to obtain and sustain in routine engagements**

**P02 (Senior, Big Four):** “The data exists, but access is the problem. Logs may sit with third parties, or permissions are controlled by the client’s IT team. If access is delayed, the audit plan shifts toward what is available.”

**P05 (Manager, Non-Big Four):** “Analytics can help, but only if data quality and extraction are workable. In fast-growing startups, systems change frequently, and what you extract today may not match what was configured a few months ago.”

**P06 (Partner, Big Four):** “Digital procedures are often triggered by red flags rather than embedded as standard. They require time and specialists, and those resources are the first to be constrained when engagement economics are tight.”

**Theme 5. Persuasive growth narratives can mute red flags unless scepticism is actively enacted**

**P07 (Senior, Big Four):** “High-growth narratives can be very convincing—new markets, social impact, rapid adoption. If you do not deliberately test those narratives against independent indicators, it is easy to rationalise anomalies as ‘growth noise’.”

**P03 (Senior, Non-Big Four):** “In platform clients, round-tripping can look like normal high-volume activity. Without targeted procedures, unusual patterns blend into the transaction noise.”

**P08 (Partner, Non-Big Four):** “The risk is not only technical; it is behavioural. Teams can become desensitised to unusual movements when management has a ready explanation and the engagement is under pressure to conclude.”

**Note on re-identification safeguards.**

To minimise re-identification risk, extracts omit names of firms/clients and avoid distinctive engagement details. Where necessary, references to systems, industries, and evidence sources are described at a general level while preserving analytic meaning.
