# Supplementary material
Source: Research Square preprint supplement (doi:10.21203/rs.3.rs-8753515/v1)
Supplement: Supplementary file 3 [file cdbcfff60dfd98b381018e4a.docx]

**Supplementary B. Interview guide and coding procedure (explanatory interviews)**

**B1. Interview guide (semi-structured)**

**Purpose (for participants):**
To understand how professional scepticism, client pressure, and reliance on management representations shape auditors’ perceived detection efficacy when auditing revenue and accounts receivable in high-growth, technology-intensive clients.

**Estimated duration:** 45–60 minutes
**Mode:** Face-to-face or secure online call
**Recording:** With consent; anonymised transcription

**Opening and context**

1. **Role and experience context**
   - Could you briefly describe your current role and typical responsibilities in audit engagements?
   - Over the last 1–3 years, what types of high-growth or technology-intensive clients have you audited (e.g., platform-based, fintech, e-commerce, SaaS)?
2. **Engagement framing**
   - Please think about one recent engagement involving complex/high-volume revenue and/or receivables. What made the engagement challenging from an evidence perspective?

**Domain A — Professional scepticism in practice (PS)**

1. **Sceptical behaviours**
   - In revenue/receivables testing, what does “professional scepticism” look like in practice for you or your team?
   - Can you share an example where scepticism changed your audit approach (e.g., increased testing, expanded confirmations, deeper system inquiry)?
2. **Triangulation and challenge**
   - How do you triangulate reported revenue/receivables with operational or digital indicators (e.g., system logs, gateway data, usage metrics)?
   - What kinds of inconsistencies do you treat as most diagnostic?

**Domain B — Client pressure and engagement constraints (CP)**

1. **Sources of pressure**
   - What types of pressures are most salient in these engagements (deadlines, fee/budget, relationship concerns, growth narrative, expectation to “close” issues quickly)?
2. **Impact on scope and evidence**
   - How do these pressures affect the depth of revenue/receivables testing?
   - Can you describe any situation where pressure led to “scope trimming” (e.g., fewer confirmations, reduced follow-up on anomalies, less forensic work)?
3. **Compliance vs detection orientation**
   - In your view, what distinguishes a “compliance audit” from a “detection-oriented audit” in these contexts?

**Domain C — Reliance on management representations (RMR)**

1. **When representations substitute for independent evidence**
   - Under what conditions do management explanations/representations become the primary basis for concluding on revenue/receivables issues?
2. **Judgement and comfort level**
   - How comfortable are you when you must rely heavily on management representations? What additional safeguards do you seek (if any)?
3. **Constraints to external/digital evidence**

- What are the most common barriers to obtaining independent evidence (access rights, privacy, third-party vendors, time, technical limitations)?

**Domain D — Perceived detection efficacy (PDE) and “what improves detectability”**

1. **Confidence in detectability**

- How confident are you that typical audit procedures would detect material irregularities in revenue/receivables in high-growth/platform clients? Why?

1. **Signals and red flags**

- What are the most credible red flags in digital/platform revenue environments?

1. **Effective evidence combinations**

- Which evidence combinations most increase detectability (e.g., confirmations + gateway logs + reconciliations + analytics)?

1. **Failure modes**

- In your experience, what are the most common reasons detection can fail even when audits appear compliant?

**Closing**

1. **Recommendations**

- If you could change one thing in engagement design or evidence strategy to strengthen fraud detectability, what would it be?

1. **Final check**

- Is there anything else we should understand about auditing revenue/receivables in high-growth digital contexts?

**B2. Coding and analysis procedure (summary)**

**Analytic approach:** Reflexive thematic analysis with a hybrid code logic (deductive + inductive).

**Data preparation:**
Audio recordings (with consent) were transcribed verbatim. Identifying information (names of firms, clients, individuals, locations that enable inference) was removed during transcription. Each participant was assigned an anonymised identifier (e.g., IF01–IF08).

**Coding strategy (two-layer):**

1. **Deductive (construct-led) codes** aligned with the survey model:
   - **PS**: questioning mindset, challenging narratives, corroboration, triangulation, withholding premature conclusions
   - **CP**: time pressure, budget/fee pressure, relational pressure, scope trimming, prioritising documentable procedures
   - **RMR**: reliance on representations, substituting evidence, unresolved issues “closed” via representations, access constraints
   - **PDE**: confidence in detectability, perceived effectiveness of procedures, ability to distinguish noise vs red flags
2. **Inductive (practice-led) codes** capturing context-specific mechanisms and evidence dynamics, such as:
   - growth narratives; platform opacity; data access barriers; third-party dependency; “compliance vs detection” tension; digital trace use; confirmation delays; selective forensic escalation; organisational support; client-controlled evidence channels.

**Theme development:**
Codes were iteratively clustered into candidate themes explaining *how* and *why* PS, CP, and RMR shape PDE. Themes were refined by checking internal coherence (within-theme consistency), external distinction (between-theme clarity), and alignment with quantitative patterns (explanatory sequential logic).

**Trustworthiness and linkage to quantitative phase:**
Maximum-variation sampling ensured heterogeneity across firm type and rank, supporting breadth of perspectives. Analytic memos documented decisions and emerging explanations for statistical relationships (e.g., mechanisms linking client pressure to scope trimming and reduced corroboration). Quotes used in reporting were selected for representativeness and were anonymised to prevent re-identification.

**B3. Survey consent text (first page of questionnaire; electronic consent)**

**Participant Information and Consent (Survey)**
You are invited to take part in a research study examining auditors’ professional judgement and evidence use in auditing high-growth, technology-intensive clients. Participation is voluntary.

- **What you will do:** Complete an online questionnaire (approx. 8–12 minutes).
- **Voluntary participation:** You may stop at any time by closing the browser. You may skip any question you do not wish to answer.
- **Risks/benefits:** No direct benefits are guaranteed. Risks are minimal; questions relate to professional experiences and perceptions.
- **Confidentiality:** No personally identifying information (e.g., name, employer, client names) is collected. Responses will be analysed and reported only in aggregate form.
- **Use of data:** Data will be used for academic research and publication. De-identified outputs may be shared for review purposes under safeguards to prevent re-identification.

**Consent statement (mandatory):**
☐ *I confirm that I am at least 18 years old, I have read and understood the information above, and I voluntarily agree to participate in this survey.*
*(Participants could proceed to the survey items only after selecting the checkbox.)*

**B4. Interview consent form text (template; written/electronic consent)**

**Participant Information and Consent (Interview)**
Study topic: Auditors’ judgement and perceived detection efficacy in auditing revenue/receivables for high-growth, technology-intensive clients.

- **Interview format and duration:** Semi-structured interview, approx. 45–60 minutes, conducted via secure online call or face-to-face.
- **Voluntary participation:** Participation is voluntary. You may decline to answer any question and may withdraw at any time without consequences.
- **Recording:** With your permission, the interview will be audio-recorded to ensure accuracy. If you do not agree to recording, the interview can proceed with written notes only.
- **Confidentiality and anonymity:** Your identity, employer, client identities, and any identifying details will not be reported. Transcripts will be anonymised, and any potentially identifying information will be removed during transcription.
- **Data use and access:** Data will be used for academic research and publication. Only de-identified excerpts may be used in reporting. Access is restricted to the research team.

**Consent (to be approved electronically):**
By signing/approving below, I confirm that:

1. I have read and understood the information above;
2. I voluntarily agree to participate in the interview;
3. I understand I may withdraw at any time;
4. I understand that my responses will be anonymised and treated confidentially;
5. (choose one) I agree / do not agree to audio-recording.

Participant approval (electronic): ☐ Approved
Date (DD/MM/YYYY): **/**/_______
Participant code (assigned by research team): ________
Obtained by (research team): Author 1 / research team representative
