# Supplementary material
Source: Research Square preprint supplement (doi:10.21203/rs.3.rs-8753515/v1)
Supplement: Supplementary file 4 [file d628d58075b819e761a67be3.docx]

**Supplementary E. Quantitative analysis workflow (SPSS-style syntax and step-by-step procedures)**

**Purpose.** This workflow documents the quantitative data processing and statistical analysis steps used to produce the results reported in the manuscript. It is provided for editorial and peer-review verification and can be implemented in SPSS or equivalent statistical software.

**Dataset referenced.** Supplementary C1 (Quantitative_dataset_deidentified.xlsx/CSV) with items PS1–PS8, CP1–CP5, RMR1–RMR4, PDE1–PDE5, and controls BIG4, LEVEL, EXP_years.

**E1. Variable setup and coding**

Controls are coded as: BIG4 (1 = Big Four; 0 = Non-Big Four), LEVEL (1 = Manager/Partner; 0 = Staff/Senior), EXP_years (continuous years of audit experience). Likert items are coded 1–5 (1 = Strongly disagree; 5 = Strongly agree).

**E2. Reverse-coding PS8**

PS8 is reverse-coded to align directionality with the other professional scepticism items. Reverse coding is performed as: PS8_R = 6 − PS8 (where PS8 is on a 1–5 scale).

**SPSS-style syntax:**

* Reverse-code PS8 (1–5 scale).
COMPUTE PS8_R = 6 - PS8.
EXECUTE.

**E3. Compute composite construct scores (means)**

Composite scores are computed as the arithmetic mean of the items for each construct. PS_mean uses PS8_R (reverse-coded) in place of PS8. If any missing values are present, use a consistent rule (e.g., require at least 75% of items present per construct) or apply listwise deletion for regression, as specified in the manuscript.

**SPSS-style syntax:**

* Compute construct means (use PS8_R).
COMPUTE PS_mean = MEAN(PS1, PS2, PS3, PS4, PS5, PS6, PS7, PS8_R).
COMPUTE CP_mean = MEAN(CP1, CP2, CP3, CP4, CP5).
COMPUTE RMR_mean = MEAN(RMR1, RMR2, RMR3, RMR4).
COMPUTE PDE_mean = MEAN(PDE1, PDE2, PDE3, PDE4, PDE5).
EXECUTE.

**E4. Reliability assessment (Cronbach’s alpha)**

Internal consistency reliability is evaluated for each multi-item construct using Cronbach’s alpha. Item–total correlations and alpha-if-item-deleted are inspected to identify problematic items. Thresholds commonly used are α ≥ 0.70 (acceptable), α ≥ 0.80 (good), though interpretation considers construct breadth and sample context.

**SPSS-style syntax (example for PS):**

* Professional scepticism (PS) reliability.
RELIABILITY
 /VARIABLES=PS1 PS2 PS3 PS4 PS5 PS6 PS7 PS8_R
 /SCALE('PS') ALL
 /MODEL=ALPHA
 /STATISTICS=DESCRIPTIVE SCALE CORR.

* Client pressure (CP) reliability.
RELIABILITY
 /VARIABLES=CP1 CP2 CP3 CP4 CP5
 /SCALE('CP') ALL
 /MODEL=ALPHA
 /STATISTICS=DESCRIPTIVE SCALE CORR.

* Reliance on management representations (RMR) reliability.
RELIABILITY
 /VARIABLES=RMR1 RMR2 RMR3 RMR4
 /SCALE('RMR') ALL
 /MODEL=ALPHA
 /STATISTICS=DESCRIPTIVE SCALE CORR.

* Perceived detection efficacy (PDE) reliability.
RELIABILITY
 /VARIABLES=PDE1 PDE2 PDE3 PDE4 PDE5
 /SCALE('PDE') ALL
 /MODEL=ALPHA
 /STATISTICS=DESCRIPTIVE SCALE CORR.

**E5. Descriptive statistics and correlations (pre-checks)**

Prior to regression, compute descriptive statistics for controls and construct means and inspect distributions. Zero-order correlations among PS_mean, CP_mean, RMR_mean, PDE_mean and controls can be reported as preliminary evidence.

**SPSS-style syntax:**

DESCRIPTIVES VARIABLES=PS_mean CP_mean RMR_mean PDE_mean EXP_years BIG4 LEVEL
 /STATISTICS=MEAN STDDEV MIN MAX.

CORRELATIONS
 /VARIABLES=PS_mean CP_mean RMR_mean PDE_mean EXP_years BIG4 LEVEL
 /PRINT=TWOTAIL SIG.

**E6. Hypothesis test: multiple linear regression**

The baseline model estimates perceived detection efficacy as a function of professional scepticism, client pressure, and reliance on management representations, controlling for experience, seniority level, and firm type.

**Model specification:**

PDE_meanᵢ = β₀ + β₁PS_meanᵢ + β₂CP_meanᵢ + β₃RMR_meanᵢ + β₄EXP_yearsᵢ + β₅LEVELᵢ + β₆BIG4ᵢ + εᵢ

**SPSS-style syntax:**

REGRESSION
 /DEPENDENT PDE_mean
 /METHOD=ENTER PS_mean CP_mean RMR_mean EXP_years LEVEL BIG4
 /STATISTICS=COEFF OUTS R ANOVA CI(95) COLLIN TOL.

**E7. Regression diagnostics and robustness checks**

Diagnostics assess key linear regression assumptions and potential threats to inference:

• Normality of residuals: inspect Q–Q plot of standardized residuals and conduct Shapiro–Wilk test (or Kolmogorov–Smirnov in SPSS), noting that normality tests can be sensitive in moderate samples; visual inspection is prioritised.
• Multicollinearity: evaluate tolerance and variance inflation factors (VIF); common cutoffs are VIF < 5 (conservative) or < 10 (lenient).
• Homoskedasticity: inspect residuals vs. fitted values plot; conduct a Breusch–Pagan test for heteroskedasticity (available via SPSS extensions or alternative software).

**SPSS-style procedures (plots and collinearity):**

* Save residuals and diagnostics.
REGRESSION
 /DEPENDENT PDE_mean
 /METHOD=ENTER PS_mean CP_mean RMR_mean EXP_years LEVEL BIG4
 /SAVE ZRESID ZPRED.

* Normality check: Q–Q plot of residuals (menu-based).
* Analyze → Descriptive Statistics → Q–Q plots (or Explore) using ZRESID.

* Optional normality test (SPSS Explore provides tests and plots).
EXAMINE VARIABLES=ZRESID
 /PLOT=NONE
 /STATISTICS=NONE
 /CINTERVAL=95
 /COMPARE=NONE
 /NORMALITY.

**Breusch–Pagan test (implementation note):**

SPSS does not include Breusch–Pagan by default in the base menus. The test can be conducted using an SPSS extension (e.g., via the R Essentials integration) or by exporting the dataset to R/Stata/Python. For review purposes, we report whether the test was performed and its conclusion (e.g., no evidence of heteroskedasticity). A reproducible alternative is to run an auxiliary regression of squared residuals on the predictors and compute the BP statistic (LM = n·R²).

**Reproducible BP test (generic steps):**

1) Save residuals from the main regression and compute squared residuals (e²). 2) Regress e² on the same set of predictors used in the main model. 3) Compute LM = n × R² from this auxiliary regression and compare to χ²(df = number of predictors).

**E8. Reporting conventions (to align manuscript and supplementary files)**

Report unstandardized coefficients (B), standard errors, t-values, p-values, and 95% confidence intervals. Include model fit statistics (R², adjusted R², F-test), and diagnostics (VIF ranges, normality assessment summary, heteroskedasticity test conclusion). Where applicable, state how missing data were handled and confirm that results are based on de-identified data.

**Note.** This document provides the analysis workflow for verification. If requested, the authors can provide the exact software output files (e.g., SPSS .spv) and/or syntax files used to generate the reported tables for the review process, subject to confidentiality safeguards.
