# Supplementary material
Source: Research Square preprint supplement (doi:10.21203/rs.3.rs-8753515/v1)
Supplement: Supplementary file 5 [file e5245663b5ac3fa1b183469a.xlsx]

## Sheet: data_deidentified
Column1	Column2	Column3	Column4	Column5	Column6	Column7	Column8	Column9	Column10	Column11	Column12	Column13	Column14	Column15	Column16	Column17	Column18	Column19	Column20	Column21	Column22	Column23	Column24	Column25	Column26	Column27	Column28	Column29	Column30
Respondent_ID	BIG4	LEVEL	EXP_years	PS1	PS2	PS3	PS4	PS5	PS6	PS7	PS8	CP1	CP2	CP3	CP4	CP5	RMR1	RMR2	RMR3	RMR4	PDE1	PDE2	PDE3	PDE4	PDE5	PS_mean	CP_mean	RMR_mean	PDE_mean
R001	0	0	2.2	4	4	4	2	5	4	4	2	3	3	3	3	3	3	3	4	3	3	2	2	3	2	3.62	3	3.25	2.4
R002	1	0	4.4	5	5	5	2	5	4	5	1	2	3	3	3	3	3	3	4	3	4	4	4	4	4	4	2.8	3.25	4
R003	1	0	4.6	5	4	5	1	5	5	4	1	3	3	3	3	3	3	3	4	3	4	5	4	5	4	3.75	3	3.25	4.4
R004	1	0	2.1	4	4	4	2	4	4	4	1	4	4	4	4	4	3	3	2	3	3	3	3	3	3	3.38	4	2.75	3
R005	0	1	11.5	4	4	5	1	4	4	5	2	2	2	2	1	2	3	4	4	4	4	3	3	4	3	3.62	1.8	3.75	3.4
R006	0	0	5.2	4	3	4	3	3	3	4	2	3	3	3	3	3	3	3	3	3	5	4	4	4	4	3.25	3	3	4.2
R007	0	0	1.7	4	4	4	2	4	4	5	2	4	3	3	4	3	3	3	3	3	3	2	3	3	2	3.62	3.4	3	2.6
R008	1	1	6.3	3	3	3	3	3	3	3	3	3	3	3	3	3	4	3	4	4	3	3	3	3	3	3	3	3.75	3
R009	1	0	7	5	4	4	2	5	4	4	1	4	4	4	4	4	3	3	3	4	5	5	5	5	5	3.62	4	3.25	5
R010	1	0	5	3	4	4	2	3	4	4	2	3	3	2	3	3	4	5	4	4	4	4	4	4	4	3.25	2.8	4.25	4
R011	0	0	3.1	5	5	5	1	5	5	5	1	3	3	3	3	3	4	3	2	3	3	3	3	3	3	4	3	3	3
R012	1	0	2	5	4	5	1	4	5	4	2	3	3	3	3	3	2	2	2	2	4	4	5	5	5	3.75	3	2	4.6
R013	1	1	3.5	2	2	2	3	2	2	2	4	2	2	3	2	2	3	4	3	3	4	3	4	3	4	2.38	2.2	3.25	3.6
R014	0	1	4.7	5	4	5	1	4	5	5	2	3	4	4	5	4	4	4	4	5	3	3	3	4	4	3.88	4	4.25	3.4
R015	0	0	3.8	3	3	4	3	3	4	3	2	3	3	3	3	3	3	3	2	2	4	4	4	3	3	3.12	3	2.5	3.6
R016	0	1	9.3	4	4	3	3	3	2	3	3	4	4	4	3	4	4	3	3	4	3	3	3	3	3	3.12	3.8	3.5	3
R017	0	1	5.7	4	4	4	2	4	3	4	2	2	1	2	2	1	2	3	2	2	4	4	4	4	4	3.38	1.6	2.25	4
R018	0	0	1.8	4	3	4	3	3	4	4	2	4	4	4	4	4	3	3	3	3	5	5	4	4	4	3.38	4	3	4.4
R019	0	1	1.5	4	4	4	2	4	5	4	3	3	3	3	4	3	2	2	2	2	3	3	3	3	3	3.75	3.2	2	3
R020	0	0	5.2	4	4	4	2	4	4	4	2	4	4	4	4	4	4	5	5	4	3	2	2	2	2	3.5	4	4.5	2.2
R021	1	1	3.2	3	4	4	2	4	4	3	2	3	3	3	4	3	5	5	4	5	3	3	3	3	3	3.25	3.2	4.75	3
R022	0	1	6	5	5	4	2	5	5	5	1	3	3	3	4	3	4	4	4	4	5	5	4	4	4	4	3.2	4	4.4
R023	0	0	5.2	4	4	4	2	4	4	4	2	3	3	2	2	3	3	2	3	2	4	5	5	4	5	3.5	2.6	2.5	4.6
R024	0	0	3.5	4	4	5	2	4	4	4	2	3	3	3	3	3	3	3	3	2	2	3	3	2	3	3.62	3	2.75	2.6
R025	0	0	1.9	5	5	5	1	4	5	4	1	3	4	4	3	4	3	3	3	3	3	4	4	4	4	3.75	3.6	3	3.8
R026	1	0	0.9	2	1	2	4	3	2	2	3	4	4	4	3	3	4	4	4	4	3	2	3	3	3	2.38	3.6	4	2.8
R027	0	1	4.3	4	3	4	2	3	4	4	2	3	3	4	4	4	3	4	4	3	3	3	3	4	3	3.25	3.6	3.5	3.2
R028	0	1	1.3	3	3	3	3	3	3	2	3	3	4	4	4	4	4	4	4	4	3	3	3	3	4	2.88	3.8	4	3.2
R029	1	0	1.8	2	2	2	4	3	3	3	3	3	3	4	4	4	3	3	3	4	2	3	2	2	2	2.75	3.6	3.25	2.2
R030	0	0	4.2	5	4	3	2	4	5	4	2	4	4	4	3	4	3	3	3	2	4	5	5	5	5	3.62	3.8	2.75	4.8
R031	1	0	3.9	3	3	3	3	4	3	3	2	4	4	4	3	3	3	2	2	3	3	3	3	3	3	3	3.6	2.5	3
R032	0	0	1.4	3	4	3	3	3	3	4	3	2	2	2	2	3	3	3	3	3	4	3	4	4	3	3.25	2.2	3	3.6
R033	0	0	7.5	2	2	2	4	2	2	2	4	4	4	3	4	4	3	3	2	3	3	3	3	3	3	2.5	3.8	2.75	3
R034	1	0	7.4	5	3	4	2	5	5	4	1	4	4	4	4	4	3	3	2	2	3	3	3	3	4	3.62	4	2.5	3.2
R035	1	1	5.3	4	4	4	2	4	4	4	2	2	3	3	3	3	2	2	2	2	5	5	5	5	5	3.5	2.8	2	5
R036	1	0	5.3	3	4	3	3	3	4	3	2	2	4	3	3	3	2	2	1	1	5	4	4	5	4	3.12	3	1.5	4.4
R037	0	0	5.3	3	3	3	3	3	3	2	3	3	4	4	4	3	4	3	4	3	2	3	2	2	3	2.88	3.6	3.5	2.4
R038	0	1	7	3	4	4	2	3	3	4	2	5	4	5	4	4	1	1	2	1	3	3	2	2	3	3.12	4.4	1.25	2.6
R039	1	0	5.8	3	3	3	4	3	3	3	3	3	4	3	3	3	3	3	3	3	2	2	3	3	3	3.12	3.2	3	2.6
R040	0	1	2	3	3	3	3	4	3	4	3	3	3	3	3	3	2	3	3	3	4	3	3	4	3	3.25	3	2.75	3.4
R041	0	1	3.1	4	4	4	1	4	4	4	1	4	4	4	4	4	3	3	4	3	3	3	3	3	3	3.25	4	3.25	3
R042	0	0	14.3	4	4	4	2	3	4	3	3	5	5	5	5	5	4	4	4	4	3	2	3	3	3	3.38	5	4	2.8
R043	0	0	0.6	5	5	5	1	5	5	5	2	3	3	3	3	3	2	2	2	3	5	5	5	5	5	4.12	3	2.25	5
R044	1	0	2.6	3	3	3	3	3	2	3	3	3	2	2	2	2	4	4	4	3	3	3	3	3	3	2.88	2.2	3.75	3
R045	0	0	7.6	4	4	3	2	4	3	4	2	3	2	3	3	3	3	3	3	2	3	4	4	3	3	3.25	2.8	2.75	3.4
R046	1	0	2.1	4	3	3	3	3	3	4	3	3	3	3	3	3	3	3	3	2	3	2	3	2	3	3.25	3	2.75	2.6
R047	0	0	5.9	4	4	3	2	3	3	4	3	2	2	1	2	2	3	3	3	3	3	3	4	4	3	3.25	1.8	3	3.4
R048	0	0	3.9	3	4	4	3	4	4	4	3	3	3	4	4	4	3	3	4	3	3	2	3	3	3	3.62	3.6	3.25	2.8
R049	0	0	2.2	4	4	3	3	3	4	4	3	5	3	4	3	4	4	3	3	3	4	4	5	4	4	3.5	3.8	3.25	4.2
R050	0	0	0.5	4	5	5	1	5	5	5	2	4	4	4	3	3	2	3	2	3	3	3	4	3	4	4	3.6	2.5	3.4
R051	1	1	4.3	3	3	3	3	3	2	3	4	4	4	4	4	4	2	1	1	1	3	3	3	3	3	3	4	1.25	3
R052	1	0	2	4	3	4	3	4	4	3	2	2	2	3	3	2	4	4	4	3	3	3	2	2	3	3.38	2.4	3.75	2.6
R053	1	0	3.4	4	4	4	2	4	4	4	2	5	5	5	5	5	3	2	2	2	3	3	3	2	3	3.5	5	2.25	2.8
R054	1	0	5.3	4	3	3	3	3	4	3	3	3	3	3	3	2	3	4	4	3	4	4	4	4	4	3.25	2.8	3.5	4
R055	1	1	6.6	4	4	5	2	4	4	5	1	2	3	3	2	2	4	5	4	5	3	3	2	3	2	3.62	2.4	4.5	2.6
R056	1	0	2.6	3	3	3	3	3	3	3	3	4	3	3	4	4	4	3	3	3	3	3	3	4	4	3	3.6	3.25	3.4
R057	0	0	2.2	5	5	5	1	5	5	5	2	3	2	2	3	3	3	2	3	3	3	4	4	4	3	4.12	2.6	2.75	3.6
R058	0	1	1.2	4	4	4	2	4	4	4	2	3	3	3	3	3	3	2	2	3	4	4	3	4	4	3.5	3	2.5	3.8
R059	0	0	6.8	5	5	4	2	4	5	4	2	3	2	1	2	2	2	3	3	3	4	4	4	4	4	3.88	2	2.75	4
R060	0	1	13.1	4	4	4	2	5	4	4	2	3	2	3	3	3	4	4	4	4	4	4	3	4	3	3.62	2.8	4	3.6
R061	0	0	7.3	2	2	2	4	2	2	3	4	5	5	4	4	5	3	3	3	3	1	2	2	2	2	2.62	4.6	3	1.8
R062	0	0	8.4	3	4	4	2	4	4	3	2	3	3	3	3	3	4	4	4	3	3	4	4	3	4	3.25	3	3.75	3.6
R063	1	0	2.1	4	3	3	2	4	4	3	2	3	3	3	3	3	3	3	3	3	4	4	4	4	4	3.12	3	3	4
R064	0	0	5.1	4	4	4	3	4	4	4	2	3	3	3	3	3	2	3	2	3	4	4	4	5	4	3.62	3	2.5	4.2
R065	0	0	6.3	5	5	5	1	5	5	5	2	4	4	4	4	4	3	4	3	3	4	3	3	3	3	4.12	4	3.25	3.2
R066	0	1	0.5	4	4	4	2	4	4	4	1	2	3	3	3	2	2	2	3	2	5	5	5	4	5	3.38	2.6	2.25	4.8
R067	0	0	1.6	3	3	4	2	3	4	4	1	3	3	3	3	3	4	4	4	4	4	5	5	4	4	3	3	4	4.4
R068	1	0	10.2	3	4	3	3	4	3	3	2	3	4	3	3	3	2	3	3	3	4	4	4	4	4	3.12	3.2	2.75	4
R069	0	0	1	5	4	4	1	4	5	4	1	5	4	5	4	4	3	4	4	4	3	2	2	3	2	3.5	4.4	3.75	2.4
R070	1	0	9.2	4	4	4	2	4	4	4	2	3	2	3	3	2	2	2	3	2	3	4	4	4	3	3.5	2.6	2.25	3.6
R071	1	0	1	4	4	4	2	5	4	5	2	2	3	3	2	2	1	1	1	2	4	4	4	5	5	3.75	2.4	1.25	4.4
R072	0	0	1.6	5	5	5	1	5	5	5	1	2	3	3	3	3	3	3	3	3	5	5	5	5	5	4	2.8	3	5
R073	0	0	5.1	4	4	4	2	4	4	5	2	3	4	3	3	3	3	4	4	3	4	4	4	3	4	3.62	3.2	3.5	3.8
R074	1	0	3.9	3	3	3	3	3	4	2	3	3	3	2	3	3	4	4	4	4	3	3	3	3	3	3	2.8	4	3
R075	1	0	2.8	4	3	4	3	4	4	4	3	3	4	3	3	3	4	3	4	3	5	5	5	5	4	3.62	3.2	3.5	4.8
R076	1	0	10	5	4	4	2	5	4	4	2	3	2	3	3	3	3	3	2	3	4	5	4	4	5	3.75	2.8	2.75	4.4
R077	1	0	1.3	3	3	4	2	3	3	3	3	4	4	3	4	4	2	1	1	2	4	3	3	3	4	3	3.8	1.5	3.4
R078	0	0	3.3	4	4	4	2	4	3	4	3	4	4	4	4	4	3	2	3	2	3	3	2	3	2	3.5	4	2.5	2.6
R079	0	1	5.6	3	3	4	2	3	4	4	2	3	2	3	2	3	3	3	3	3	4	4	4	4	3	3.12	2.6	3	3.8
R080	0	0	4.6	3	3	3	4	3	3	3	3	4	4	4	4	4	4	3	3	3	3	3	3	3	3	3.12	4	3.25	3
R081	1	0	2.3	2	2	3	4	2	2	2	4	3	3	3	3	3	3	3	3	3	2	2	3	3	2	2.62	3	3	2.4
R082	1	0	2.3	3	3	3	2	4	4	4	3	4	3	3	3	3	3	3	2	3	3	3	3	2	3	3.25	3.2	2.75	2.8
R083	0	1	6.6	3	4	4	2	4	4	4	2	2	3	2	3	3	4	3	3	3	3	4	3	4	3	3.38	2.6	3.25	3.4
R084	0	1	6.8	3	4	3	3	4	3	4	2	5	5	5	5	5	3	3	3	2	3	4	4	4	4	3.25	5	2.75	3.8
R085	0	0	4.6	2	2	1	4	2	2	2	5	2	3	2	2	2	2	2	2	2	3	2	3	3	2	2.5	2.2	2	2.6
R086	0	0	1.9	4	4	4	3	4	3	4	2	3	3	4	3	3	3	3	3	3	3	3	4	3	3	3.5	3.2	3	3.2
R087	1	1	2.4	4	4	4	1	5	4	4	2	4	4	4	3	4	2	2	3	2	3	3	3	4	3	3.5	3.8	2.25	3.2
R088	1	0	3.7	3	4	5	3	3	4	4	2	4	3	4	4	4	2	3	3	3	3	4	3	3	3	3.5	3.8	2.75	3.2
R089	1	0	4.1	3	3	4	2	4	3	4	3	3	2	3	4	2	3	2	3	2	3	4	5	3	4	3.25	2.8	2.5	3.8
R090	0	0	5.4	3	4	3	2	4	4	3	3	4	4	4	4	3	3	3	3	3	3	3	3	3	3	3.25	3.8	3	3
R091	0	0	3.2	3	4	4	3	3	3	3	2	4	4	4	4	4	2	2	2	3	4	3	3	3	3	3.12	4	2.25	3.2
R092	1	1	6.5	4	3	3	2	4	4	3	2	5	5	4	5	4	3	3	3	3	2	3	2	3	4	3.12	4.6	3	2.8
R093	1	1	6.4	3	3	3	3	3	3	2	3	3	2	3	3	3	4	4	5	4	3	2	3	2	2	2.88	2.8	4.25	2.4
R094	0	0	8.6	3	3	3	3	3	3	3	3	4	4	4	4	5	1	2	3	2	4	4	4	4	4	3	4.2	2	4
R095	1	0	3.8	2	3	3	3	2	3	3	4	5	4	4	4	5	2	2	2	2	1	2	2	2	2	2.88	4.4	2	1.8
R096	0	0	4.7	4	3	4	3	3	3	3	3	5	4	4	4	4	3	3	3	3	3	3	2	3	3	3.25	4.2	3	2.8
R097	0	1	3.4	4	5	5	2	4	5	5	1	5	5	4	4	5	4	4	4	3	3	3	3	3	3	3.88	4.6	3.75	3
R098	0	1	1.9	4	4	4	2	4	3	3	3	3	2	3	2	2	3	3	3	4	3	3	2	2	3	3.38	2.4	3.25	2.6
R099	0	1	12.9	5	5	4	2	4	4	4	2	5	5	4	5	5	4	4	4	4	2	2	3	3	3	3.75	4.8	4	2.6
R100	0	1	7.9	4	4	3	2	4	4	4	2	4	4	4	4	4	5	4	4	5	3	2	3	3	3	3.38	4	4.5	2.8
