# Supplementary material
Source: Research Square preprint supplement (doi:10.21203/rs.3.rs-8753515/v1)
Supplement: Supplementary file 6 [file f7fbf1cabc6cc41d9070ed49.docx]

**Supplementary A. Survey items, scales, and source notes**

**A1. Survey header**

**Purpose & instruction:**
This survey examines auditors’ perceptions and experiences when auditing revenue and accounts receivable in high-growth, technology-intensive clients (e.g., platform-based, fintech, e-commerce, SaaS). There are no right or wrong answers. Please answer based on your most recent relevant engagements.

**Response format:**
All items use a 5-point Likert scale:
1 = Strongly disagree; 2 = Disagree; 3 = Neither agree nor disagree; 4 = Agree; 5 = Strongly agree.

**Note for analysis:**
Construct scores are computed as the mean of items. One scepticism item is reverse-coded (noted below).

**A2. Professional scepticism (PS) — 8 items**

**Construct definition (operational):** A questioning mindset and critical evaluation of evidence, including withholding premature conclusions and seeking corroboration.
**Source note:** Adapted from the professional scepticism scale developed by Hurtt (2010), with wording contextualised to revenue/receivables and digital-platform audits.

**Items (PS1–PS8):**

- **PS1** I actively look for evidence that could contradict management’s explanations.
- **PS2** I delay forming conclusions until I have evaluated multiple independent sources of evidence.
- **PS3** When audit evidence appears consistent, I still consider whether alternative explanations may exist.
- **PS4** I feel comfortable challenging management when information seems incomplete or overly optimistic.
- **PS5** I routinely ask follow-up questions when answers rely on assumptions rather than verifiable records.
- **PS6** I seek corroboration from system logs, third-party records, or external confirmations where possible.
- **PS7** I remain alert to the possibility that “growth narratives” can mask reporting irregularities.
- **PS8 (reverse-coded)** If management provides a plausible explanation, I typically accept it without needing additional corroboration. **(R)**

**Scoring:** PS = mean(PS1–PS7, reverse(PS8)).

**A3. Client pressure (CP) — 5 items**

**Construct definition:** Perceived engagement pressures (time, budget/fee, relationship concerns) that can constrain audit depth.
**Source note:** Adapted from prior audit research on time/budget pressure and commercial pressure (e.g., Pierce & Sweeney, 2004), with wording tailored to revenue/receivables and startup settings.

**Items (CP1–CP5):**

- **CP1** Tight deadlines in my engagements often limit how deeply we can probe revenue/receivables anomalies.
- **CP2** Budget/fee constraints reduce the feasibility of extended testing or additional confirmations.
- **CP3** Concerns about maintaining the client relationship can discourage aggressive follow-up on red flags.
- **CP4** Engagement pressure sometimes leads us to prioritise procedures that are easiest to document over those most diagnostic for fraud.
- **CP5** I have experienced implicit or explicit pressure to accept client-reported figures when obtaining independent evidence is costly or slow.

**Scoring:** CP = mean(CP1–CP5).

**A4. Reliance on management representations (RMR) — 4 items**

**Construct definition:** Tendency to substitute management-provided explanations/representations and internal documents for more independent evidence when challenges arise.
**Source note:** Items are developed and contextualised from the evidential logic in ISA 240 (fraud) and ISA 580 (written representations), reflecting the lower reliability of representations relative to independent evidence in fraud-prone areas.

**Items (RMR1–RMR4):**

- **RMR1** When third-party confirmations or external data are difficult to obtain, we tend to rely more on management explanations and internal documentation.
- **RMR2** In practice, management representations are sometimes used to close unresolved issues in revenue/receivables testing.
- **RMR3** Limited access to platform/system data increases our dependence on information provided by management.
- **RMR4** Compared to independent sources, we often accept management-provided evidence as sufficient due to engagement constraints.

**Scoring:** RMR = mean(RMR1–RMR4).

**A5. Perceived detection efficacy (PDE) — 5 items (Dependent variable)**

**Construct definition:** Auditors’ perceived capability of their procedures to surface material misstatements/fraud and distinguish meaningful red flags from noise in complex, high-growth contexts.
**Source note:** Items are constructed to align with ISA 240’s focus on fraud-risk responses and revenue-related assertions, informed by revenue/receivables fraud literature (e.g., Brazel et al., 2009) and the study’s context (digital traces, third-party data, platform complexity).

**Items (PDE1–PDE5):**

- **PDE1** Our audit procedures are effective at detecting materially misstated or fraudulent revenue in high-growth/digital-platform clients.
- **PDE2** We can reliably identify inconsistencies between financial records and operational/digital indicators (e.g., platform usage, system logs, gateway data).
- **PDE3** We are able to distinguish genuine red flags from “noise” in high-volume transaction environments.
- **PDE4** Our procedures are effective at detecting manipulation of supporting documents or evidence related to revenue/receivables.
- **PDE5** Overall, I am confident that our evidence approach would uncover material irregularities in revenue/receivables if they exist.

**Scoring:** PDE = mean(PDE1–PDE5).

**A6. Brief demographics**

- **EXP** Years of external audit experience: ___ years
- **LEVEL** Current rank: (1) Staff/Junior; (2) Senior; (3) Supervisor/Manager; (4) Partner/Engagement Partner
- **BIG4** Firm type: (1) Big Four; (0) Non-Big Four
- **Industry exposure check** In the past three years, have you audited at least one high-growth/technology-related client? (Yes/No)
- **Cycle involvement check** Were you directly involved in revenue and/or receivables testing/confirmations? (Yes/No)
